# Supplementary material for: Electrochemical Molecular Conversion of α-Keto Acid to Amino Acid at a Low Overpotential Using a Nanoporous Gold Catalyst
Source: MDPI journal article supplement (doi:10.3390/ijms22179442), 2021-08-31
Supplement: s1 [file s1]

– Supplementary Figures –

## **Electrochemical Molecular Conversion of $\alpha$ -Keto Acid to Amino Acid at a Low Overpotential Using a Nanoporous Gold Catalyst**

**Yasuhiro Mie \*, Shizuka Katagai and Chitose Mikami**

*Bioproduction Research Institute, National Institute of Advanced Industrial Science and Technology (AIST), 2-17-2-1, Tsukisamu-higashi, Toyohira, Sapporo 062-8517, Japan; s.katagai@aist.go.jp (S.K.); mikami-c@aist.go.jp (C.M.)*

*\* Corresponding Author: Yasuhiro Mie*

*Tel.: +81-11-857-8913; Fax: +81-11-857-8915;*

*Email: yasuihiro.mie@aist.go.jp*

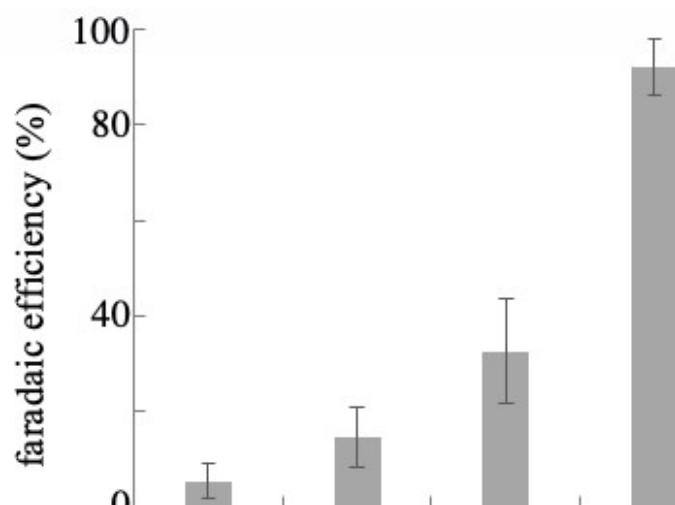

**Figure. S1.** FE for L-glutamic acid production obtained at the NPG electrode as a function of the  $\alpha$ -ketoglutaric acid concentration. Electrolysis was conducted in the presence of  $\text{NH}_2\text{OH}$  for 30 min.

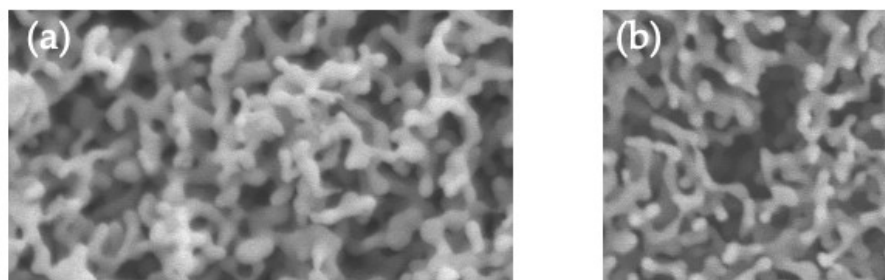

**Figure. S2.** Scanning electron microscopy images of the NPG electrode before (a) and after (b) the electrolysis experiments under the conditions described in Figure 5 in a  $1.5 \times 1.0 \mu\text{m}$  region.
